# Supplementary material for: Assimilating ESA CCI land surface temperature into the ORCHIDEE land surface model: insights from a multi-site study across Europe
Source: Copernicus journal article supplement (doi:10.5194/hess-29-261-2025), 2025-01-15
Supplement: Supplementary file 1 [file hess-29-261-2025-supplement.pdf]

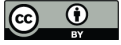

*Supplement of*

## **Assimilating ESA CCI land surface temperature into the ORCHIDEE land surface model: insights from a multi-site study across Europe**

**Luis-Enrique Olivera-Guerra et al.**

*Correspondence to:* Luis-Enrique Olivera-Guerra ([luis.olivera@lsce.ipsl.fr](mailto:luis.olivera@lsce.ipsl.fr))

The copyright of individual parts of the supplement might differ from the article licence.

**Table S1.** DA experiments performed and ORCHIDEE variables optimized.

| <b>Experiment name</b>          | <b>Selected observational constraint</b>     |
|---------------------------------|----------------------------------------------|
| LST13                           | LST at 13:00 local time (12:00 UTC)          |
| Tmin                            | Minimum daily LST over 3-hourly interval     |
| Tmax                            | Maximum daily LST over 3-hourly interval     |
| Ampl                            | Daily amplitude LST over 3-hourly interval   |
| slope13                         | Temporal gradient between 10:00 and 13:00 LT |
| slope19                         | Temporal gradient between 16:00 and 19:00 LT |
| LST13+slope13                   | LST13 + slope13                              |
| LST13+slope19                   | LST13 + slope19                              |
| LST13+slope13+slope19           | LST13 + slope13 + slope19                    |
| LST13+slope13+slope19+Ampl      | LST13+slope13+slope19+Ampl                   |
| LST13+slope13+slope19+Ampl+Tmax | LST13+slope13+slope19+Ampl+Tmax              |
| 3h-LST                          | 3-hourly LST series                          |
| 3h-LST+Tmin                     | 3h-LST + Tmin                                |
| 3h-LST+Tmax                     | 3h-LST + Tmax                                |
| 3h-LST+Ampl                     | 3h-LST + Ampl                                |
| 3h-LST+Ampl+Tmax                | 3h-LST + Ampl + Tmax                         |

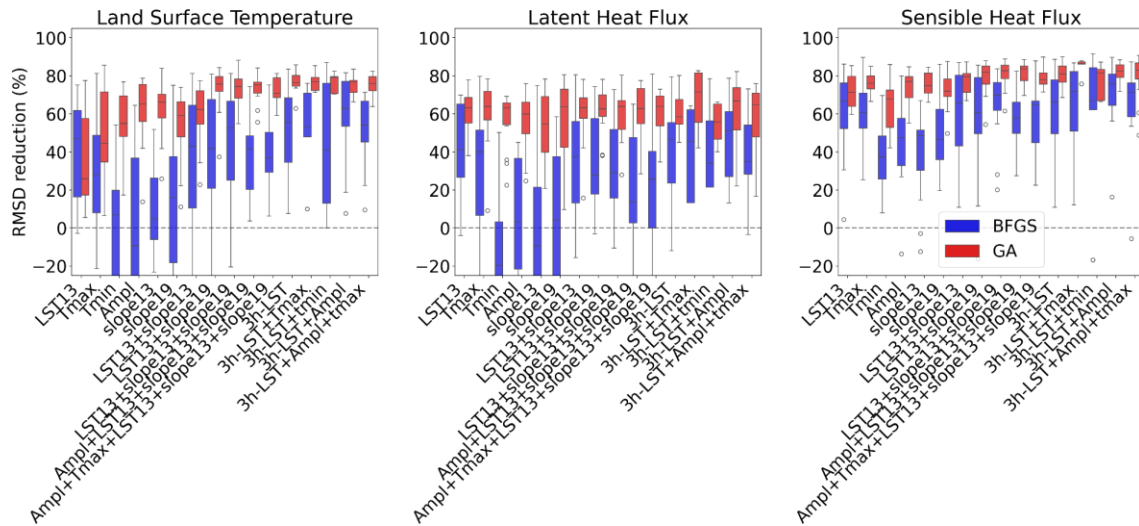

**Figure S1.** Boxplots obtained within 16 optimization tests with random first-guess parameter values for each DA experiment over the selected site in Spain (ES-Abr) comparing the performances between the gradient-based (in blue) and genetic (in red) methods in terms of model–data RMSD reduction (%) obtained for 30-min LST, LE and H. The x-axis indicates the DA experiment assimilating different observational constraints detailed in Table S1.

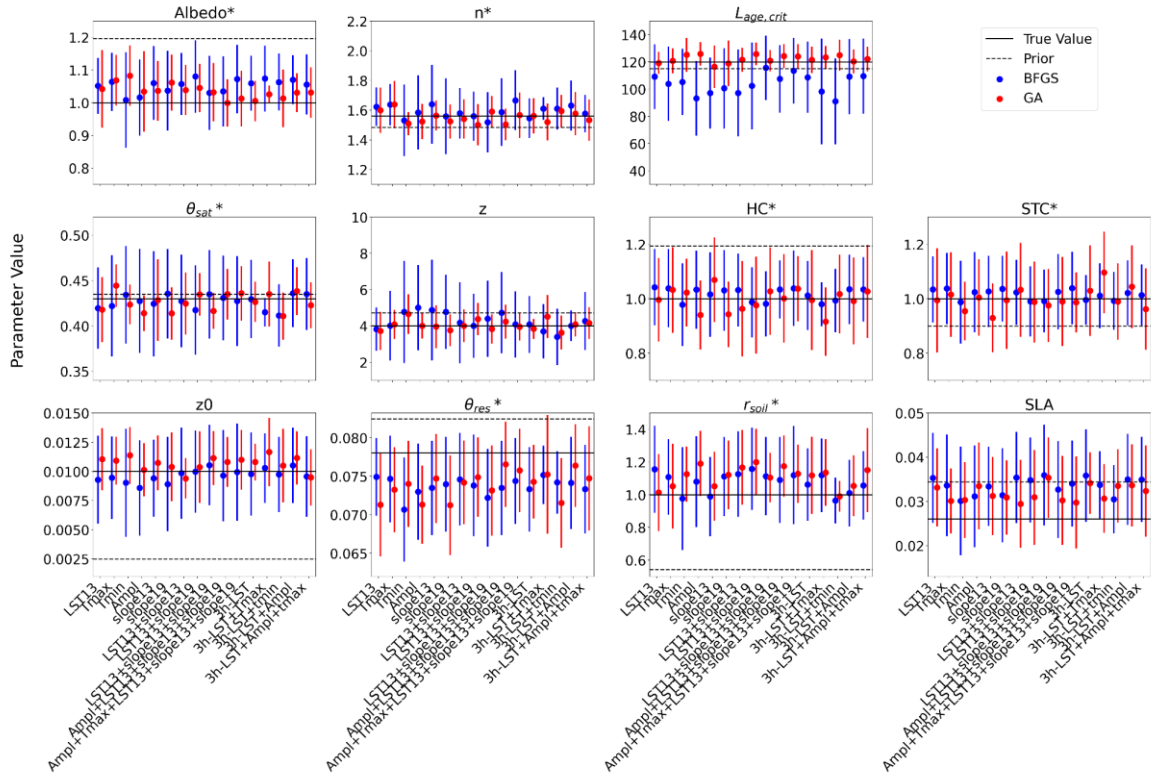

**Figure S2.** Parameter estimates for each DA experiment over the selected site in Spain (ES-Abr) comparing the 11 optimized parameters between the gradient-based (in blue) and genetic (in red) methods. Parameter estimates are represented by the mean and standard deviation across 16 optimization tests with random first-guess parameter values. The x-axis indicates the experiment assimilating 3-hourly LST pseudo-observations and the derived characteristics of the diurnal cycle. The ‘true’ parameter (default ORCHIDEE value) and prior values (defined randomly) are represented by the solid and dashed horizontal lines, respectively.

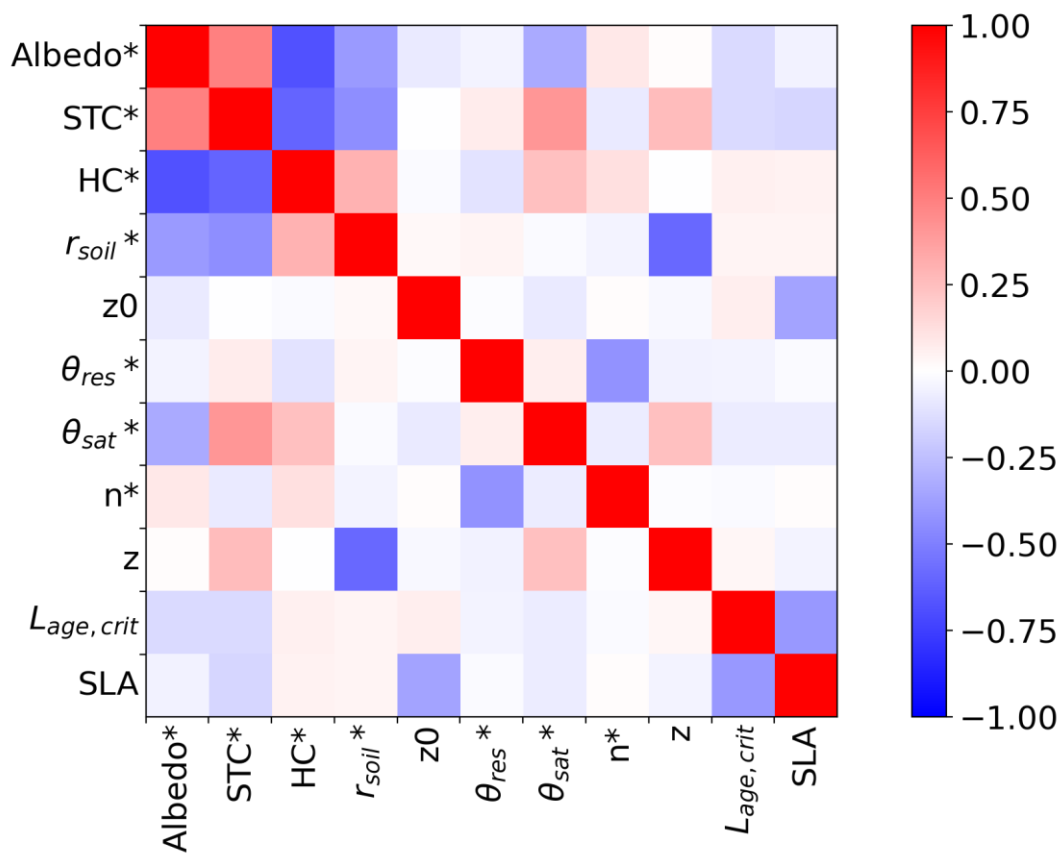

**Figure S3.** Covariance matrix of posterior parameter estimates assimilating the full 3-hourly LST series alone (3h-LST DA experiment) over the selected site in Spain (ES-Abr).

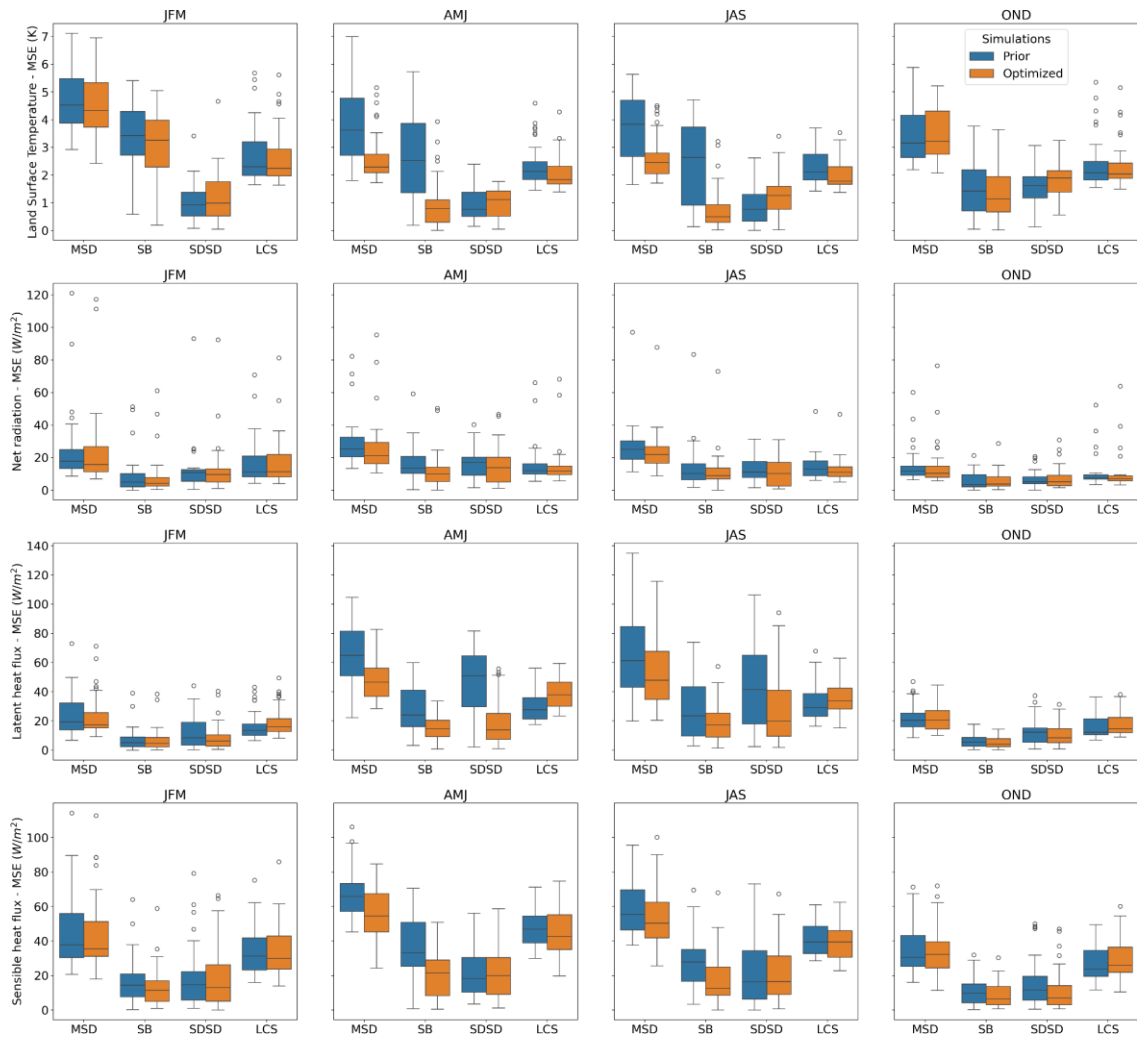

**Figure S4.** Boxplots showing the decomposition of MSE per season in terms of bias (SB), difference of standard deviations (SDSD) and lack of correlation (LCS) between the model and observations for half-hourly LST, Rn, LE and H across sites in 2018.
